# Supplementary material
Source: MDPI journal article supplement (https://www.mdpi.com/2072-4292/12/8/1327)
Supplement: s1 [file s1]

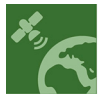

## Supplementary Materials

**Table S1.** Landsat product ID and sun elevation for each training and application scene. Training scenes are denoted by red and application scenes are shown in black. Date of image collection is included in the product ID naming convention. Scenes are separated by location; (a) from Amery Ice Shelf and (b) from Roi Baudouin Ice Shelf. (c) Scenes used for manual polygon and pixel validation datasets.

| A. Amery Ice Shelf |                           | B. Roi Baudouin Ice Shelf |                           |
|--------------------|---------------------------|---------------------------|---------------------------|
| Sun Elevation (°)  | Landsat Product ID        | Sun Elevation (°)         | Landsat Product ID        |
| 5.3                | LC08_L1GT_128111_20150403 | 10.3                      | LC08_L1GT_155110_20180323 |
| 5.3                | LC08_L1GT_128111_20150403 | 11.3                      | LC08_L1GT_155110_20170320 |
| 5.5                | LC08_L1GT_126111_20140909 | 11.9                      | LC08_L1GT_153109_20170322 |
| 5.6                | LC08_L1GT_126111_20140402 | 14.0                      | LC08_L1GT_154109_20180924 |
| 7.4                | LC08_L1GT_129111_20140914 | 15.1                      | LC08_L1GT_154109_20170313 |
| 10.5               | LC08_L1GT_126112_20140925 | 16.5                      | LC08_L1GT_153109_20170930 |
| 11.8               | LC08_L1GT_126111_20140925 | 18.6                      | LC08_L1GT_153109_20160303 |
| 12.3               | LC08_L1GT_129111_20170314 | 20.8                      | LC08_L1GT_154109_20170225 |
| 12.9               | LC08_L1GT_126112_20170309 | 23.2                      | LC08_L1GT_154109_20151018 |
| 13.1               | LC08_L1GT_126111_20180312 | 23.5                      | LC08_L1GT_155110_20160214 |
| 14.8               | LC08_L1GT_129111_20151003 | 24.9                      | LC08_L1GT_153109_20150213 |
| 17.3               | LC08_L1GT_127111_20170228 | 26.1                      | LC08_L1GT_154109_20181026 |
| 17.9               | LC08_L1GT_128111_20140227 | 27.7                      | LC08_L1GT_154109_20150204 |
| 19.5               | LC08_L1GT_128111_20180222 | 29.3                      | LC08_L1GT_154110_20170124 |
| 21.4               | LC08_L1GT_128111_20160217 | 31.2                      | LC08_L1GT_154109_20160122 |
| 22.5               | LC08_L1GT_129111_20180213 | 31.3                      | LC08_L1GT_154110_20140116 |
| 23.2               | LC08_L1GT_128111_20140211 | 32.2                      | LC08_L1GT_154110_20180111 |
| 24.7               | LC08_L1GT_128111_20180206 | 32.5                      | LC08_L1GT_154109_20140116 |
| 25.5               | LC08_L1GT_128111_20170203 | 32.7                      | LC08_L1GT_154109_20151119 |
| 26.3               | LC08_L1GT_128111_20160201 | 33.3                      | LC08_L1GT_154109_20180111 |
| 27.0               | LC08_L1GT_128111_20150129 | 33.4                      | LC08_L1GT_154110_20150103 |
| 27.3               | LC08_L1GT_126112_20180123 | 33.5                      | LC08_L1GT_155110_20180102 |
| 27.4               | LC08_L1GT_128111_20131107 | 34.3                      | LC08_L1GT_155110_20141225 |

|      |                           |                                                                                                  |                             |
|------|---------------------------|--------------------------------------------------------------------------------------------------|-----------------------------|
| 27.4 | LC08_L1GT_127111_20170127 | 34.8                                                                                             | LC08_L1GT_153109_20170101   |
| 27.6 | LC08_L1GT_127112_20150122 | 35.1                                                                                             | LC08_L1GT_153109_20151230   |
| 27.8 | LC08_L1GT_128112_20180121 | 35.4                                                                                             | LC08_L1GT_154109_20171226   |
| 27.8 | LC08_L1GT_128111_20140126 |                                                                                                  |                             |
| 28.1 | LC08_L1GT_129112_20150120 |                                                                                                  |                             |
| 28.8 | LC08_L1GT_128111_20151113 | <b>C. Manual polygon and pixel validation scenes<br/>(Amery and Roi Baudouin(*) ice shelves)</b> |                             |
| 29.0 | LC08_L1GT_128111_20180121 |                                                                                                  |                             |
| 29.4 | LC08_L1GT_128111_20161115 |                                                                                                  |                             |
| 29.6 | LC08_L1GT_128111_20170118 | 20.8                                                                                             | LC08_L1GT_154109_20170225 * |
| 30.0 | LC08_L1GT_128111_20171118 | 25.4                                                                                             | LC08_L1GT_127111_20140204   |
| 30.8 | LC08_L1GT_128112_20180105 | 32.4                                                                                             | LC08_L1GT_128111_20170102   |
| 31.1 | LC08_L1GT_128111_20131123 | 32.5                                                                                             | LC08_L1GT_154109_20140116 * |
| 31.2 | LC08_L1GT_126112_20160102 | 33.0                                                                                             | LC08_L1GT_127111_20161226   |
| 31.3 | LC08_L1GT_128111_20140110 | 33.2                                                                                             | LC08_L1GT_127111_20141221   |
| 32.3 | LC08_L1GT_128111_20161201 |                                                                                                  |                             |
| 32.3 | LC08_L1GT_128111_20170102 |                                                                                                  |                             |
| 32.9 | LC08_L1GT_128111_20141228 |                                                                                                  |                             |
| 33.0 | LC08_L1GT_127111_20161226 |                                                                                                  |                             |
| 33.0 | LC08_L1GT_126111_20131227 |                                                                                                  |                             |
| 33.1 | LC08_L1GT_129111_20161224 |                                                                                                  |                             |
| 33.1 | LC08_L1GT_128111_20131209 |                                                                                                  |                             |
| 33.2 | LC08_L1GT_128111_20151215 |                                                                                                  |                             |
| 33.2 | LC08_L1GT_128111_20171220 |                                                                                                  |                             |

### Section SI.1. Supervised Classification Algorithms

We assess the sensitivity of classified lake areas to classification algorithm using resubstitution accuracy and our pixel-level validation dataset (Table S2 and Table S3, respectively). Resubstitution accuracy was computed by blindly applying the trained classifier to the original training dataset and calculating classification accuracy compared to a known input (i.e., the training data). This analysis allowed us to evaluate the sensitivity of our training data and ensure that classes are spectrally distinct (Table S2).

In Figure S1, we show the best-performing algorithms (those with validation accuracy greater than 91% for training dataset t11AB; Table S3), all generated from the same training dataset and applied across Amery Ice Shelf. The Random Forest (RF) and Classification and Regression Trees

(CART) classifiers generally produce similar lake areas and have the highest resubstitution accuracies (Table S2); the Minimum Distance (MDM) classifier has lower validation and resubstitution accuracies, and can produce significantly higher lake areas through misclassification of some application scenes. The Support Vector Machine (SVM) classifier has the same validation accuracy as RF; we note that SVM is slightly better than RF at reducing cloud shadow commission and correctly identifying lakes under cloud shadows and in low-sun-elevation scenes. However, SVM produces slightly lower resubstitution accuracy, and misses some shallow lake areas compared to RF.

We therefore selected the RF algorithm (with 50 Rifle decision trees) to generate our trained supervised classifiers shown in this work based on its high resubstitution accuracy (Table S2), high accuracy based on our pixel lake validation dataset (Table S3), and consistently accurate visual lake identification (for example, across the set of Amery Ice Shelf application scenes, Figure S1).

**Table S2.** Resubstitution accuracy for supervised classifiers generated from the 11-class training dataset (t11) using different classification algorithms. Default Google Earth Engine algorithm settings were used if not specified otherwise. Percentages are reported as total (11-class) resubstitution accuracy / lake versus non-lake resubstitution accuracy (in bold).

| Supervised classification algorithm     |                                      | Resubstitution accuracy (t11AB) |
|-----------------------------------------|--------------------------------------|---------------------------------|
| Classification and Regression Trees [1] |                                      | 88.9% / <b>98.8%</b>            |
| Random Forest [2]                       | 50 Rifle decision trees per class    | 99.3% / <b>99.9%</b>            |
|                                         | 20 Rifle decision trees per class    | 98.4% / <b>99.8%</b>            |
|                                         | 1 Rifle decision trees per class     | 87.0% / <b>98.0%</b>            |
|                                         |                                      |                                 |
| Minimum Distance                        | Cosine distance from the class mean  | 46.8% / <b>91.8%</b>            |
|                                         | Mahalanobis distance from class mean | 74.4% / <b>96.7%</b>            |
|                                         | Euclidean distance from class mean   | 19.3% / <b>87.6%</b>            |
| Naive Bayes [3]                         | default                              | 61.5% / <b>94.5%</b>            |
|                                         | continuous                           | 62.6% / <b>94.9%</b>            |
| Maximum Entropy                         |                                      | 53.2% / <b>93.8%</b>            |
| Support Vector Machine [4]              |                                      | 70.1% / <b>96.3%</b>            |

**Table S3.** Validation accuracy assessed using the manual pixel lake dataset for every combination of training dataset and classification algorithm: Classification and Regression Trees (CART); Random Forest with 50, 20, and 1 Rifle decision trees ('RF 50', 'RF 20', 'RF 1'); Minimum Distance with cosine, mahalanobis, and Euclidean distance metrics ('MDC', 'MDM', 'MDE'); Naive Bayes ('Bayes' and continuous 'Bayes C'); Maximum Entropy ('Max Ent'); and Support Vector Machine (SVM).

| Amery Ice Shelf validation pixels |      |      |      |      |        |       |      |      |      |      |        |
|-----------------------------------|------|------|------|------|--------|-------|------|------|------|------|--------|
|                                   | t6A  | t7A  | t9A  | t11A | tOB11A | t11AB | t6B  | t7B  | t9B  | t11B | tOB11B |
| <b>CART</b>                       | 91.4 | 90.3 | 89.0 | 89.3 | 84.0   | 91.4  | 88.3 | 90.1 | 72.6 | 72.6 | 80.9   |
| <b>RF 50</b>                      | 91.4 | 91.6 | 93.3 | 92.0 | 89.4   | 94.9  | 88.6 | 92.4 | 78.4 | 79.3 | 78.4   |
| <b>RF 20</b>                      | 90.9 | 91.8 | 93.0 | 91.4 | 89.6   | 94.6  | 88.4 | 91.9 | 78.4 | 80.6 | 89.6   |
| <b>RF 1</b>                       | 88.5 | 90.1 | 87.0 | 87.9 | 80.0   | 88.1  | 85.5 | 92.3 | 76.9 | 82.1 | 80.0   |

|                                                 |      |      |      |      |      |      |      |      |      |      |      |
|-------------------------------------------------|------|------|------|------|------|------|------|------|------|------|------|
| <b>MDC</b>                                      | 90.3 | 89.6 | 90.1 | 90.3 | 57.4 | 90.4 | 89.4 | 92.4 | 91.8 | 91.8 | 58.3 |
| <b>MDM</b>                                      | 90.8 | 88.9 | 93.8 | 93.9 | 80.0 | 93.8 | 80.9 | 87.3 | 94.0 | 87.9 | 77.4 |
| <b>MDE</b>                                      | 66.1 | 68.1 | 63.1 | 63.4 | 57.4 | 59.1 | 57.8 | 67.0 | 67.0 | 67.0 | 57.4 |
| <b>Bayes</b>                                    | 91.8 | 91.8 | 92.1 | 91.4 | 57.4 | 90.1 | 91.9 | 93.8 | 93.6 | 84.9 | 57.4 |
| <b>Bayes C</b>                                  | 90.8 | 91.0 | 89.8 | 88.9 | 74.8 | 88.5 | 88.5 | 89.5 | 67.4 | 67.4 | 59.9 |
| <b>Max Ent</b>                                  | 90.6 | 89.1 | 89.9 | 89.8 | 42.6 | 90.8 | 89.1 | 92.1 | 90.0 | 90.4 | 43.4 |
| <b>SVM</b>                                      | 90.8 | 89.5 | 91.9 | 92.0 | 54.0 | 94.9 | 87.0 | 94.4 | 83.0 | 83.0 | 71.4 |
| <b>Roi Baudouin Ice Shelf validation pixels</b> |      |      |      |      |      |      |      |      |      |      |      |
| <b>CART</b>                                     | 94.3 | 77.8 | 74.5 | 76.0 | 65.3 | 85.3 | 86.8 | 91.0 | 78.5 | 90.3 | 74.5 |
| <b>RF 50</b>                                    | 95.5 | 80.3 | 79.5 | 76.8 | 68.8 | 89.5 | 97.0 | 97.3 | 98.3 | 97.3 | 85.8 |
| <b>RF 20</b>                                    | 95.5 | 80.5 | 79.0 | 78.5 | 69.5 | 88.5 | 96.8 | 96.8 | 97.5 | 95.8 | 69.5 |
| <b>RF 1</b>                                     | 81.5 | 78.8 | 77.3 | 76.3 | 64.0 | 78.5 | 90.5 | 94.0 | 94.5 | 93.3 | 64.0 |
| <b>MDC</b>                                      | 96.0 | 91.0 | 90.1 | 85.8 | 51.3 | 87.0 | 95.0 | 89.8 | 88.3 | 88.3 | 53.3 |
| <b>MDM</b>                                      | 95.5 | 85.5 | 85.8 | 86.5 | 71.3 | 92.3 | 93.0 | 91.5 | 91.8 | 91.3 | 64.8 |
| <b>MDE</b>                                      | 64.0 | 51.8 | 50.3 | 50.3 | 51.0 | 51.0 | 51.8 | 65.3 | 65.3 | 65.3 | 51.0 |
| <b>Bayes</b>                                    | 96.0 | 82.0 | 82.0 | 81.0 | 51.3 | 86.3 | 97.0 | 91.5 | 92.0 | 90.5 | 53.0 |
| <b>Bayes C</b>                                  | 91.3 | 89.0 | 82.3 | 80.8 | 73.3 | 88.0 | 96.0 | 91.3 | 75.8 | 75.8 | 63.8 |
| <b>Max Ent</b>                                  | 95.0 | 88.0 | 81.0 | 81.3 | 47.3 | 88.0 | 95.3 | 90.3 | 87.0 | 91.3 | 53.5 |
| <b>SVM</b>                                      | 96.5 | 72.8 | 75.0 | 74.8 | 49.0 | 87.5 | 94.5 | 92.3 | 91.0 | 91.0 | 74.5 |

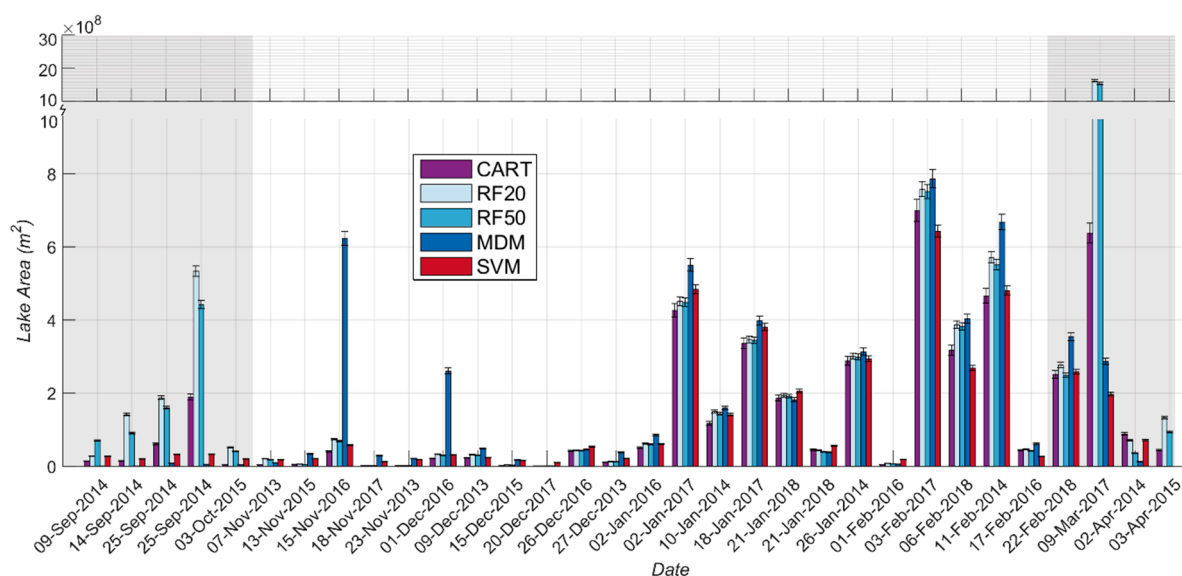

**Figure S1.** Lake areas identified across a set of application scenes across the Amery Ice Shelf, categorized by date of image acquisition. Classifiers were generated from the t11AB training dataset, using different high-performing classification algorithms. Manual cloud/cloud shadow polygons and the rock mask were applied prior to classification. Grey shading indicates scenes with sun elevation below 20°. Note the upper scale is compressed to show the exceedingly high (misclassified) lake areas for some low-sun-elevation scenes. Algorithm acronyms shown in legend: ‘CART’ is Classification and Regression Trees; ‘RF50’ and ‘RF20’ are Random Forest with 50 and 20 Rifle decision trees, respectively; ‘MDM’ is Minimum Distance with mahalanobis distance metric; and ‘SVM’ is Support Vector Machine. Error bars reflect the validation accuracy of each classifier (Table S3).

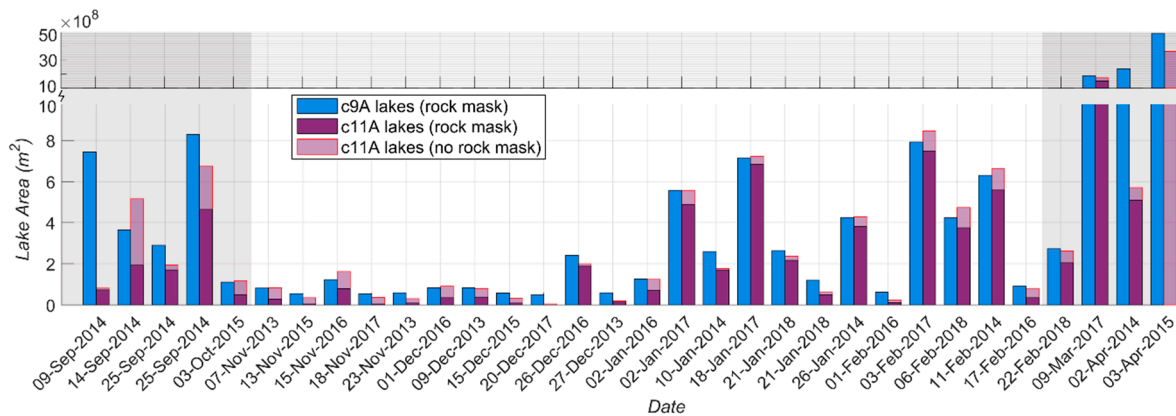

**Figure S2:** Supervised classifier results compared across the Amery Ice Shelf application scenes to investigate the effect of pre-classification rock masking versus including rock training classes. Lake areas were produced by c9A and c11A from rock-masked scenes with automated cloud removal; c11A was also applied to scenes without rock masking. Gray shading indicates scenes acquired under sun elevations < 20°. Note the upper scale is compressed to show the exceedingly high (misclassified) lake areas for some low-sun-elevation scenes.

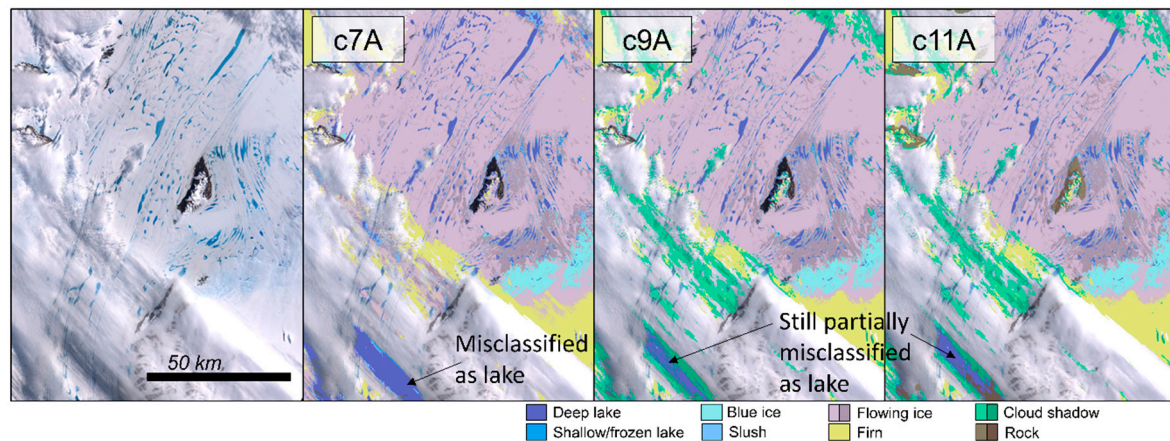

**Figure S3.** Supervised classifiers generated from different numbers of training classes are applied to Amery Ice Shelf scene LC08\_L1GT\_128111\_20170118, following automated cloud removal.

## References

1. Breiman, L.; Friedman, J.; Olshen, R.; Stone, C. Classification and Regression Trees: Wadsworth Int. Group: Wadsworth, OH, USA. **1984**, *37*, 237–251.
2. Breiman, L. Random forests. *Mach. Learn.* **2001**, *45*, 5–32.
3. Huang, J.; Lu, J.; Ling, C.X. Comparing naive Bayes, decision trees, and SVM with AUC and accuracy. In Proceedings of the Third IEEE International Conference on Data Mining; IEEE, 2003; pp. 553–556.
4. Burges, C.J.C. A tutorial on support vector machines for pattern recognition. *Data Min. Knowl. Discov.* **1998**, *2*, 121–167.
